# Supplementary material
Source: HighWire-hosted journal article supplement (https://jnm.snmjournals.org/highwire/filestream/95589/field_highwire_adjunct_files/0/232827_Supplemental_Data.pdf)
Supplement: 232827_Supplemental_Data.pdf [file 232827_Supplemental_Data.pdf]

**Supplemental Fig. 1. Distribution of ePET/CT<sub>1</sub> acquisition time, and events (PFS, mPFS, OS)**

Partially overlapping line plots visualizing distributions over time in months of ePET/CT<sub>1</sub> evaluation, time to progression and time to death. Density curves represent the distribution for each category: PMD, NMR/PMR, CMR, and overall. The tails of the distributions are highlighted to represent the 95% confidence interval. Each time points are shown below each density curve using vertical lines.

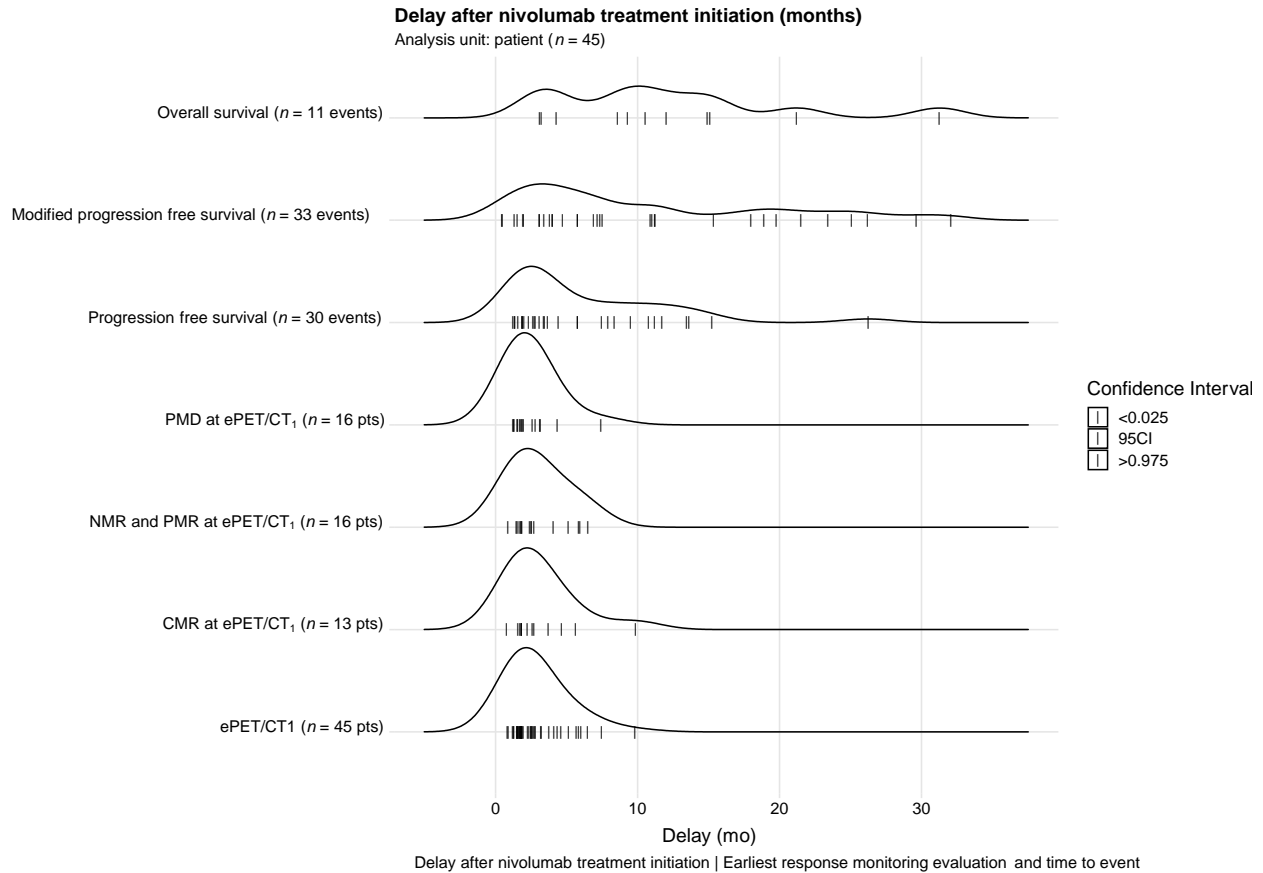

**Supplemental Fig. 2. Efficacy and duration of response per ePET/CT<sub>1</sub> response categories**

The panel shows a swimmer plot of outcomes in all 45 patients. The type of response (Lugano 2014) at ePET/CT<sub>1</sub> is displayed. Patients with a partial metabolic response on ePET<sub>1</sub> may experience prolonged clinical benefit on nivolumab (i.e., Patients 1 and 18). Patients with a partial metabolic response on ePET<sub>1</sub> may experience durable response after nivolumab discontinuation (i.e., patient 38 discontinued therapy at month-3). A durable response was observed after nivolumab treatment discontinuation in patients with a complete metabolic response at ePET<sub>1</sub> (i.e., patient 30). The evident clinical benefit led several centers to continue treatment beyond progression (i.e., patients 2-5). The decision to continue/discontinue treatment was decided onsite by clinicians during nivolumab therapies based upon their expert assessment. Nivolumab could be discontinued due to disease progression, unacceptable toxicity, physician decision, or other reason.

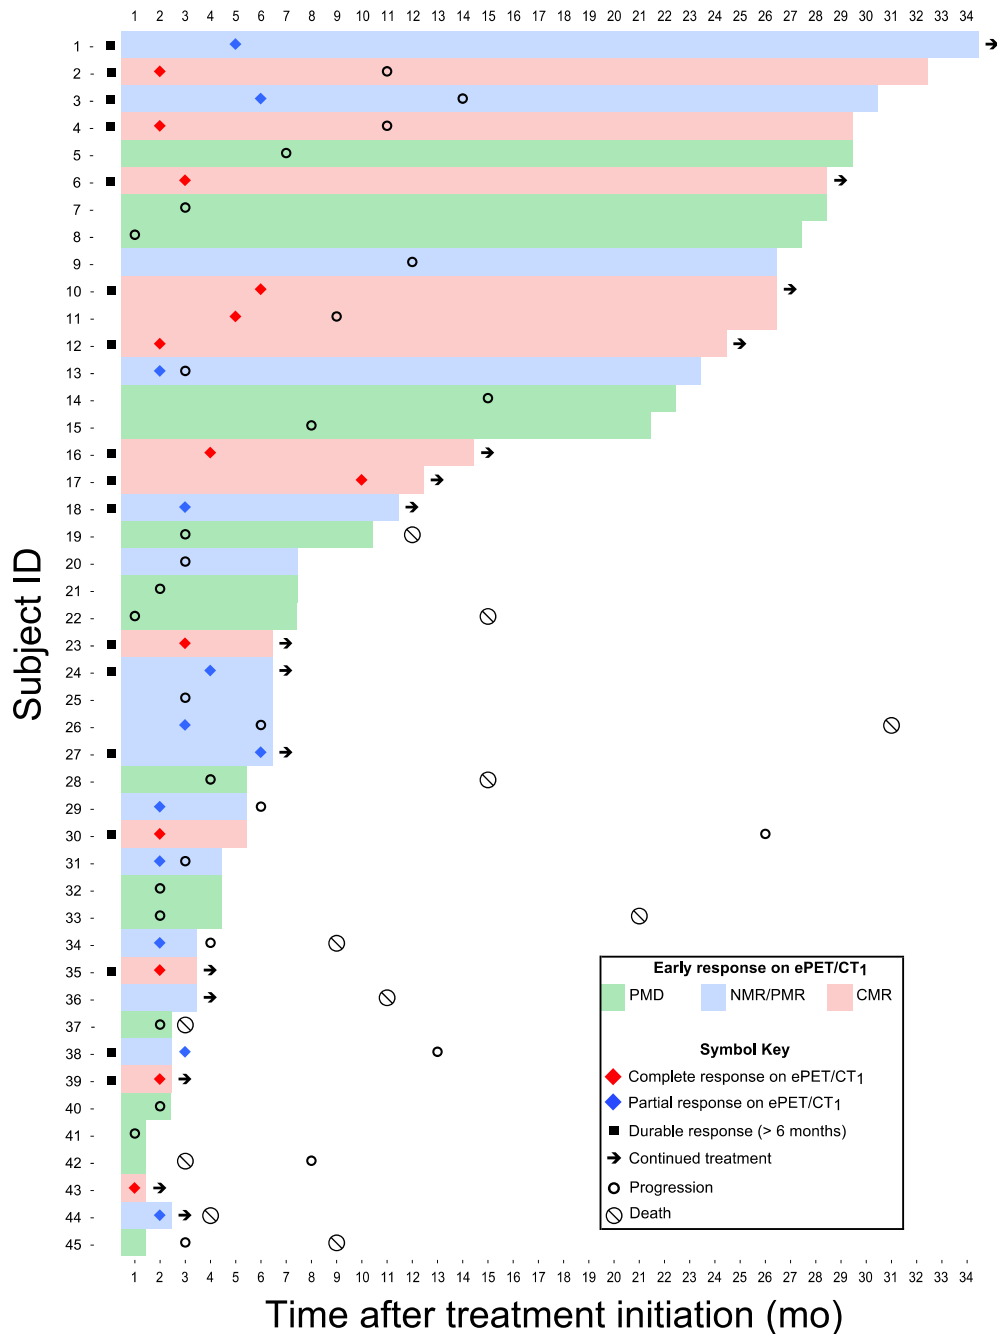

**Supplemental Fig. 3. Kaplan-Meier estimate of OS according to ePET1 response**

Using the landmark analysis at 3 months (n=32 pts), Kaplan-Meier estimate of OS from anti PD-1 mAb initiation based on ePET/CT<sub>1</sub> response classification, stratifying patients in three OS risk groups: high (PMD), low (CMR) and intermediate (NMR and PMR). Patients with CMR at ePET1 have a prolonged OS.

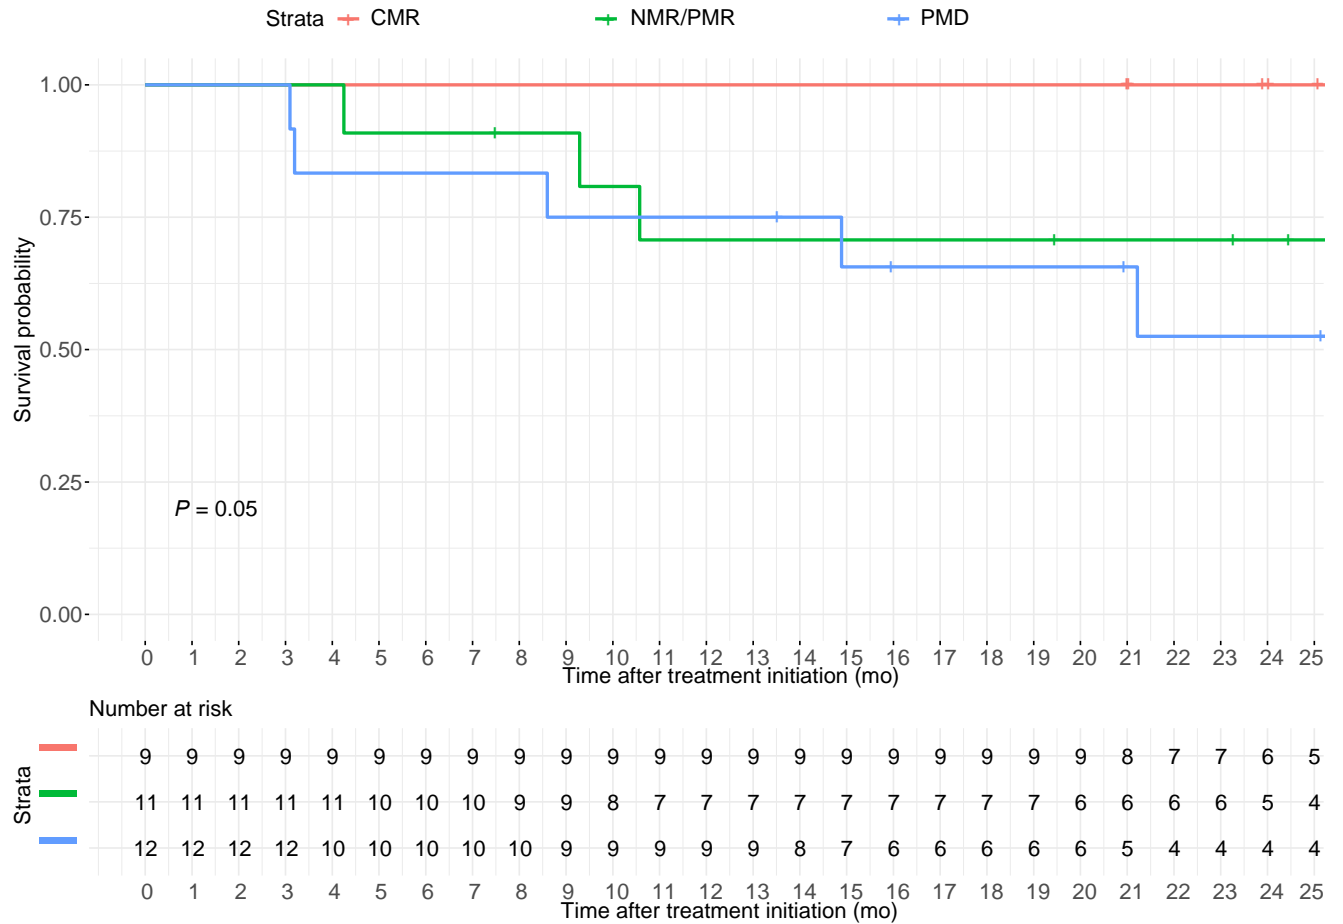

**Supplemental Fig. 4. Kaplan-Meier estimate of PFS according to the response classification using ePET1**

Kaplan-Meier estimate of Progression Free Survival from anti PD-1 mAb initiation based on ePET/CT<sub>1</sub> response classification, stratifying patients in three PFS risk groups: high (PMD), low (CMR) and intermediate (NMR and PMR). Patients classified as PMD at ePET<sub>1</sub> are not displayed in this Fig. since by definition all patients progressed at first evaluation (PET is the reference standard for response evaluation).

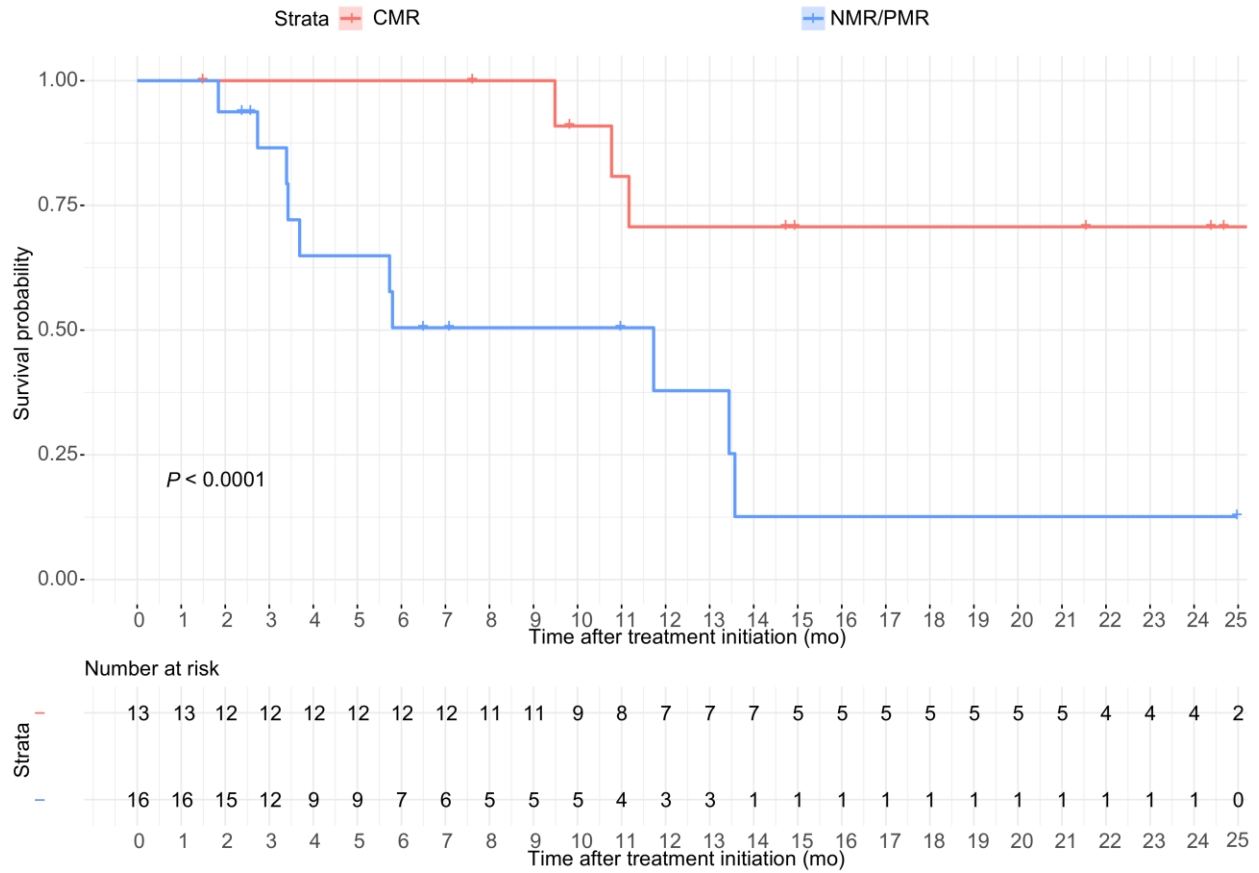

**Supplemental Fig. 5. Kaplan-Meier estimate of mPFS according to ePET1 response**

Kaplan-Meier estimate of mPFS from anti PD-1 mAb initiation based on ePET/CT<sub>1</sub> response classification, stratifying patients in three mPFS risk groups: high (PMD), low (CMR) and intermediate (NMR and PMR).

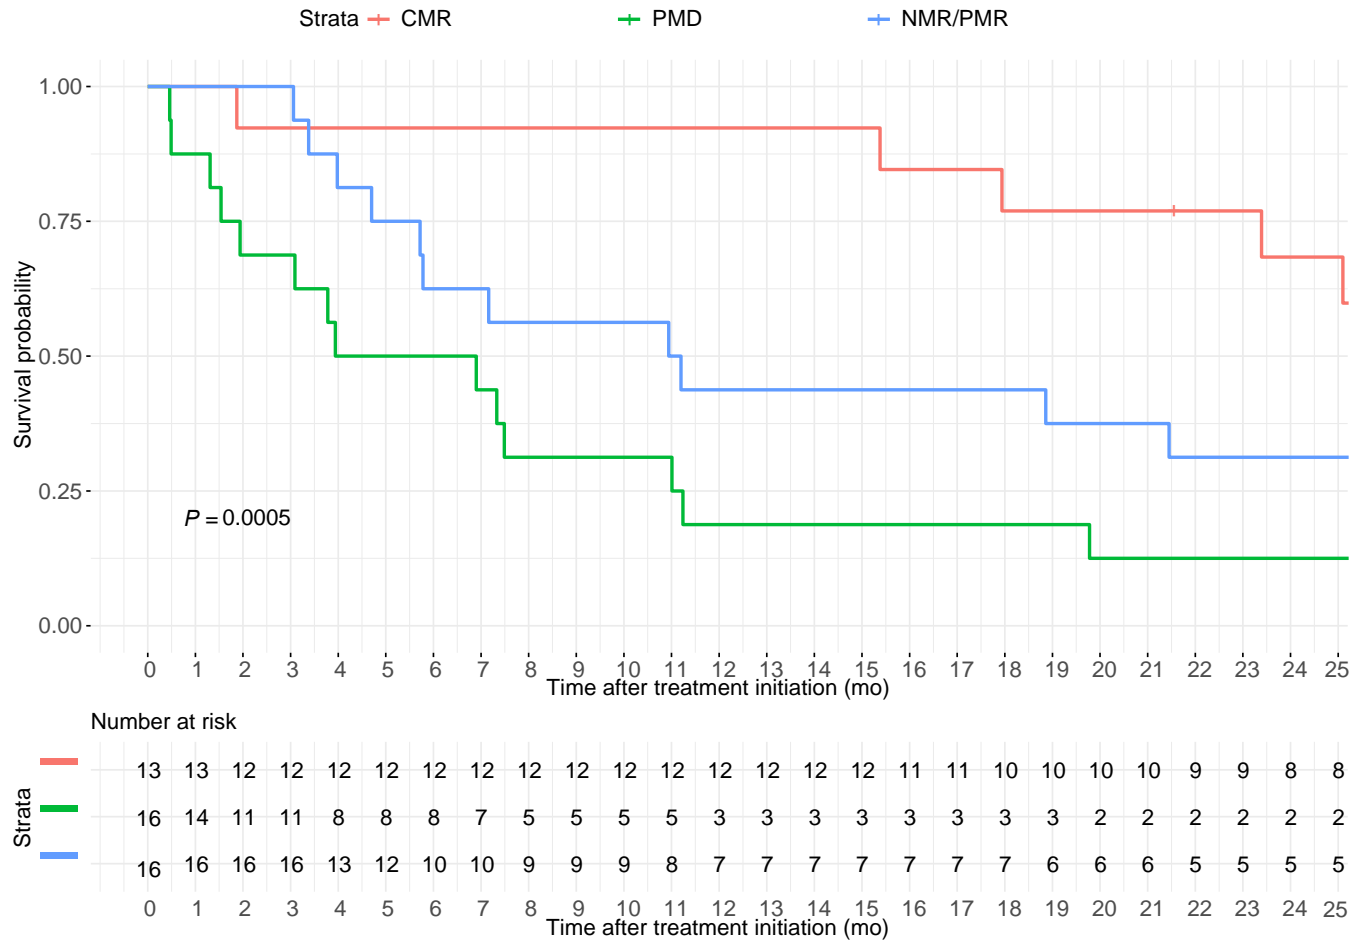

**Supplemental Table 1. Patients' characteristics**

| Characteristics                     | Overall   | Response at ePET/CT <sub>1</sub> |             |             | p     |
|-------------------------------------|-----------|----------------------------------|-------------|-------------|-------|
|                                     |           | PMD                              | NMR/PMR     | CMR         |       |
| <b>n</b>                            | 45        | 16                               | 16          | 13          |       |
| <b>Clinical characteristics</b>     |           |                                  |             |             |       |
| Male (n (%))                        | 25 (55.6) | 8 (50.0)                         | 11 (68.8)   | 6 (46.2)    | 0.408 |
| Female (n (%))                      | 20 (44.4) | 8 (50.0)                         | 5 (31.2)    | 7 (53.8)    |       |
| Age (mean (SD))                     | 45 (19)   | 51 (19)                          | 47 (18)     | 33 (14)     | 0.025 |
| B symptoms (n (%))                  | 12 (26.7) | 6 (37.5)                         | 3 (18.8)    | 3 (23.1)    | 0.442 |
| <b>Ann Arbor stage at diagnosis</b> |           |                                  |             |             |       |
| Localized                           | 12 (26.7) | 4 (25.0)                         | 3 (18.8)    | 5 (38.4)    | 0.247 |
| I (n (%))                           | 2 (4.4)   | 0 (0.0)                          | 1 (6.2)     | 1 (7.7)     |       |
| II (n (%))                          | 10 (22.2) | 4 (25.0)                         | 2 (12.5)    | 4 (30.8)    |       |
| Advanced                            | 33 (73.3) | 12 (75.0)                        | 13 (28.3)   | 8 (61.5)    |       |
| III (n (%))                         | 10 (22.2) | 4 (25.0)                         | 5 (31.2)    | 1 (7.7)     |       |
| IV (n (%))                          | 23 (51.1) | 8 (50.0)                         | 8 (50.0)    | 7 (53.8)    |       |
| <b>Prior treatments</b>             |           |                                  |             |             |       |
| Number of prior lines (mean (SD))   | 6.4 (2.9) | 6.69 (2.80)                      | 5.94 (2.24) | 6.46 (3.57) | 0.753 |
| ABVD (n (%))                        | 39 (86.7) | 16 (100.0)                       | 14 (87.5)   | 9 (69.2)    | 0.053 |
| BEACOPP (n (%))                     | 8 (17.8)  | 1 (6.2)                          | 2 (12.5)    | 5 (38.5)    | 0.062 |
| DHAP DHAC DHAO1 (n (%))             | 24 (53.3) | 7 (43.8)                         | 7 (43.8)    | 10 (76.9)   | 0.130 |
| IGEV (n (%))                        | 5 (18.8)  | 3 (18.8)                         | 1 (6.2)     | 1 (7.7)     | 0.477 |
| GPD (n (%))                         | 1 (2.2)   | 0 (0.0)                          | 0 (0.0)     | 1 (7.7)     | 0.284 |
| GVD (n (%))                         | 11 (24.4) | 2 (12.5)                         | 6 (37.5)    | 3 (23.1)    | 0.256 |
| ICE IVO1 (n (%))                    | 15 (33.3) | 7 (43.8)                         | 5 (31.2)    | 3 (23.1)    | 0.490 |
| IVA (n (%))                         | 3 (6.7)   | 1 (6.2)                          | 1 (6.2)     | 1 (7.7)     | 0.985 |
| MINE (n (%))                        | 8 (17.8)  | 2 (12.5)                         | 3 (18.8)    | 3 (23.1)    | 0.754 |
| Brentuximab Vedotin (n (%))         | 42 (93.3) | 15 (93.8)                        | 14 (87.5)   | 13 (100.0)  | 0.405 |
| Radiotherapy (n (%))                | 24 (53.3) | 10 (62.5)                        | 5 (31.2)    | 9 (69.2)    | 0.082 |
| Autograft (n (%))                   | 26 (57.8) | 8 (50.0)                         | 11 (68.8)   | 7 (53.8)    | 0.530 |
| Allograft (n (%))                   | 9 (20.0)  | 2 (12.5)                         | 4 (25.0)    | 3 (23.1)    | 0.641 |
| <b>Nivolumab treatment</b>          |           |                                  |             |             |       |
| IRAEs (mean (SD))                   | 1.6 (3.7) | 0.44 (0.63)                      | 1.38 (1.54) | 3.23 (6.64) | 0.135 |
| Cycles (mean (SD))                  | 5.7 (5.0) | 4.73 (3.69)                      | 7.29 (6.39) | 5.00 (4.26) | 0.332 |

**Supplemental Table 2. Patients' OS per early response on ePET/CT<sub>1</sub> (Lugano 2014) (landmark analysis at 3 months)**

|                      | No. Total (%) | 12-month OS estimate (95CI) | 24-month OS estimate (95CI) |
|----------------------|---------------|-----------------------------|-----------------------------|
| Overall              | 32 (100%)     | 0.81 (95CI: 0.68-0.96, n=6) | 0.73 (95CI: 0.59-0.91, n=2) |
| ePET/CT <sub>1</sub> |               |                             |                             |
| PMD                  | 12 (38%)      | 0.75 (95CI: 0.54-1.00, n=3) | 0.53 (95CI: 0.29-0.96, n=2) |
| NMR/PMR              | 11 (34%)      | 0.71 (95CI: 0.48-1.00, n=3) | 0.71 (95CI: 0.48-1.00, n=0) |
| CMR                  | 9 (28%)       | 1.00 (95CI: 1.00-1.00, n=0) | 1.00 (95CI: 1.00-1.00, n=0) |
| P-value              |               | p=0.05                      |                             |

*OS*: overall survival, *CMR*: complete metabolic response, *PMR*: partial metabolic response, *NMR*: no metabolic response, *PMD*: progressive metabolic disease. *CT*: computed tomography, *PET*: 18F-FDG PET/CT.
